# Supplementary material for: Lateral plate mesoderm cell-based organoid system for NK cell regeneration from human pluripotent stem cells
Source: Springer Nature journal article supplement (doi:10.1038/s41421-022-00467-2), 2022-11-07
Supplement: MOESM1 [file 41421_2022_467_MOESM1_ESM.pdf]

# Supplementary information

## Lateral plate mesoderm cell-based organoid system for NK cell regeneration from human pluripotent stem cells

Dehao Huang<sup>1#</sup>, Jianhuan Li<sup>2,3,#</sup>, Fangxiao Hu<sup>4#</sup>, Chengxiang Xia<sup>4#</sup>, Qitong Weng<sup>1</sup>, Tongjie Wang<sup>1</sup>, Huan Peng<sup>2,3</sup>, Bingyan Wu<sup>2,3</sup>, Hongling Wu<sup>2</sup>, Jiapin Xiong<sup>2,3</sup>, Yunqing Lin<sup>1,3</sup>, Yao Wang<sup>2,3</sup>, Qi Zhang<sup>1</sup>, Xiaofei Liu<sup>2</sup>, Lijuan Liu<sup>1</sup>, Xiujuan Zheng<sup>2,3</sup>, Yang Geng<sup>2</sup>, Xin Du<sup>5</sup>, Xiaofan Zhu<sup>6</sup>, Lei Wang<sup>1,7</sup>, Jie Hao<sup>1,7</sup>, Jinyong Wang<sup>1,3,4,\*</sup>

<sup>1</sup>State Key Laboratory of Stem Cell and Reproductive Biology, Institute for Stem Cell and Regeneration, Institute of Zoology, Chinese Academy of Sciences, Beijing 100101, China.

<sup>2</sup>CAS Key Laboratory of Regenerative Biology, Guangzhou Institutes of Biomedicine and Health, Chinese Academy of Sciences, Guangzhou 510530, China.

<sup>3</sup>University of Chinese Academy of Sciences, Beijing 100049, China.

<sup>4</sup>Beijing Institute for Stem Cell and Regenerative Medicine, Beijing 100101, China.

<sup>5</sup>Department of Hematology, Guangdong General Hospital, Guangzhou 510080, China.

<sup>6</sup>Department of Pediatrics, State Key Laboratory of Experimental Hematology, National Clinical Research Center for Blood Diseases, Institute of Hematology & Blood Diseases Hospital, Chinese Academy of Medical Sciences & Peking Union Medical College, Tianjin 300020, China

<sup>7</sup>National Stem Cell Resource Center, Chinese Academy of Sciences, Beijing 100190, China.

These authors contributed equally: Dehao Huang, Jianhuan Li, Fangxiao Hu, Chengxiang Xia

\*Correspondence: Jinyong Wang ([wangjinyong@ioz.ac.cn](mailto:wangjinyong@ioz.ac.cn))

34 **Supplementary Figures and Figure legends**

**Supplementary Fig.S1**

**a**

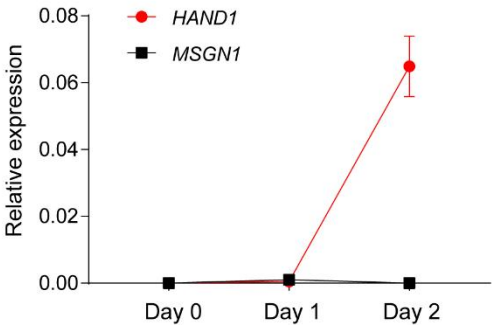

**b**

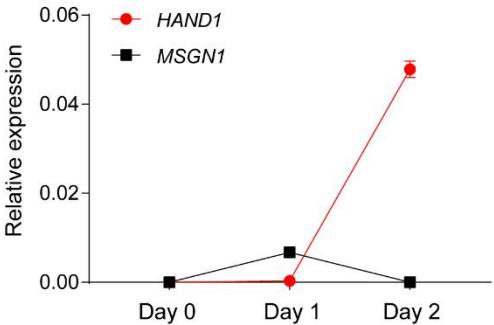

**c**

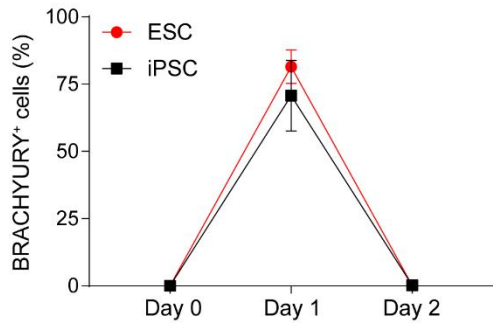

**d**

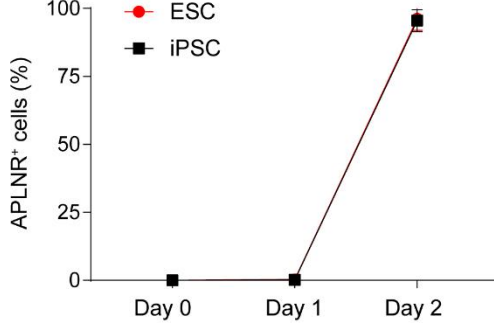

35

36 **Supplementary Fig. S1 Analysis of primitive streak and lateral plate**

37 **mesoderm-specific markers of hPSC-derived cells**

38 **a** Real-time quantitative PCR analysis of *HAND1* and *MSGN1* gene expression levels  
 39 of ESC-derived cells on Day 0, Day 1, and Day 2. **b** Real-time quantitative PCR  
 40 analysis of *HAND1* and *MSGN1* gene expression levels of iPSC-derived cells on Day  
 41 0, Day 1, and Day 2. **c** The proportion of BRACHYURY<sup>+</sup> cells in hPSC-derived cells  
 42 on Day 0, Day 1, and Day 2. Data were collected from three independent experiments.  
 43 *n* = 3. **d** The proportion of APLNR<sup>+</sup> cells in hPSC-derived cells on Day 0, Day 1, and  
 44 Day 2. Data were collected from three independent experiments. *n* = 3. ESC: human  
 45 ESC line hPSC-2; iPSC: human iPSC line hPSC-6.

46

## Supplementary Fig.S2

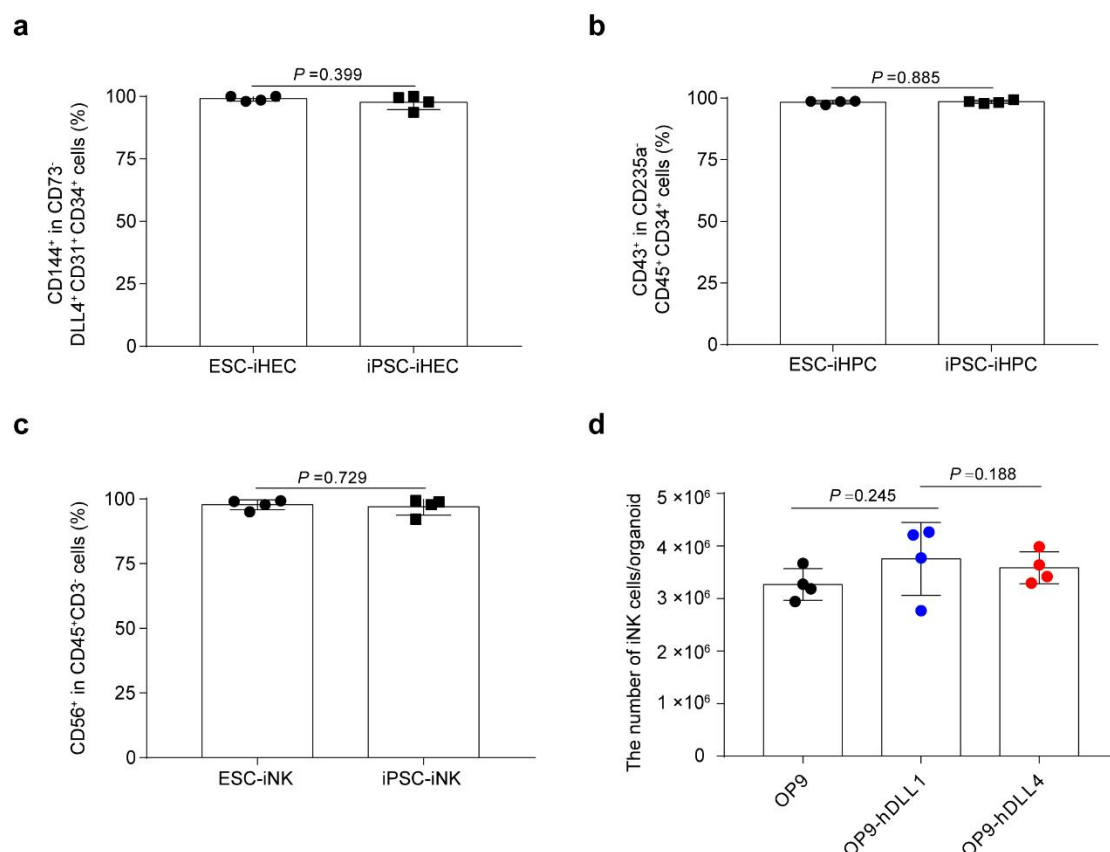

### Supplementary Fig. S2 Analysis of the efficiency of iHEC, iHPC, and iNK cell regeneration from hPSCs

**a** The proportion of CD144<sup>+</sup> cells in CD73<sup>-</sup>DLL4<sup>+</sup>CD31<sup>+</sup>CD34<sup>+</sup> iHECs on Day 9. Data were collected from four independent experiments and analyzed by two-tailed independent *t*-test.  $n = 4$ . **b** The proportion of CD43<sup>+</sup> cells in CD235a<sup>-</sup>CD45<sup>+</sup>CD34<sup>+</sup> iHPCs on Day 16. Data were collected from four independent experiments and analyzed by Mann-Whitney U test.  $n = 4$ . **c** The proportion of CD56<sup>+</sup> cells in CD45<sup>+</sup>CD3<sup>-</sup> cells on Day 27. Data were collected from four independent experiments and analyzed by two-tailed independent *t*-test.  $n = 4$ . **d**  $5 \times 10^5$  OP9, OP9-hDLL1, and OP9-hDLL4 feeder cells were combined with  $2 \times 10^4$  mesoderm cells separately to form organoid aggregates on Day 2. Data were collected and analyzed on Day 27 ( $n = 4$  each group). Statistics: two-tailed independent *t*-test.

# Supplementary Fig.S3

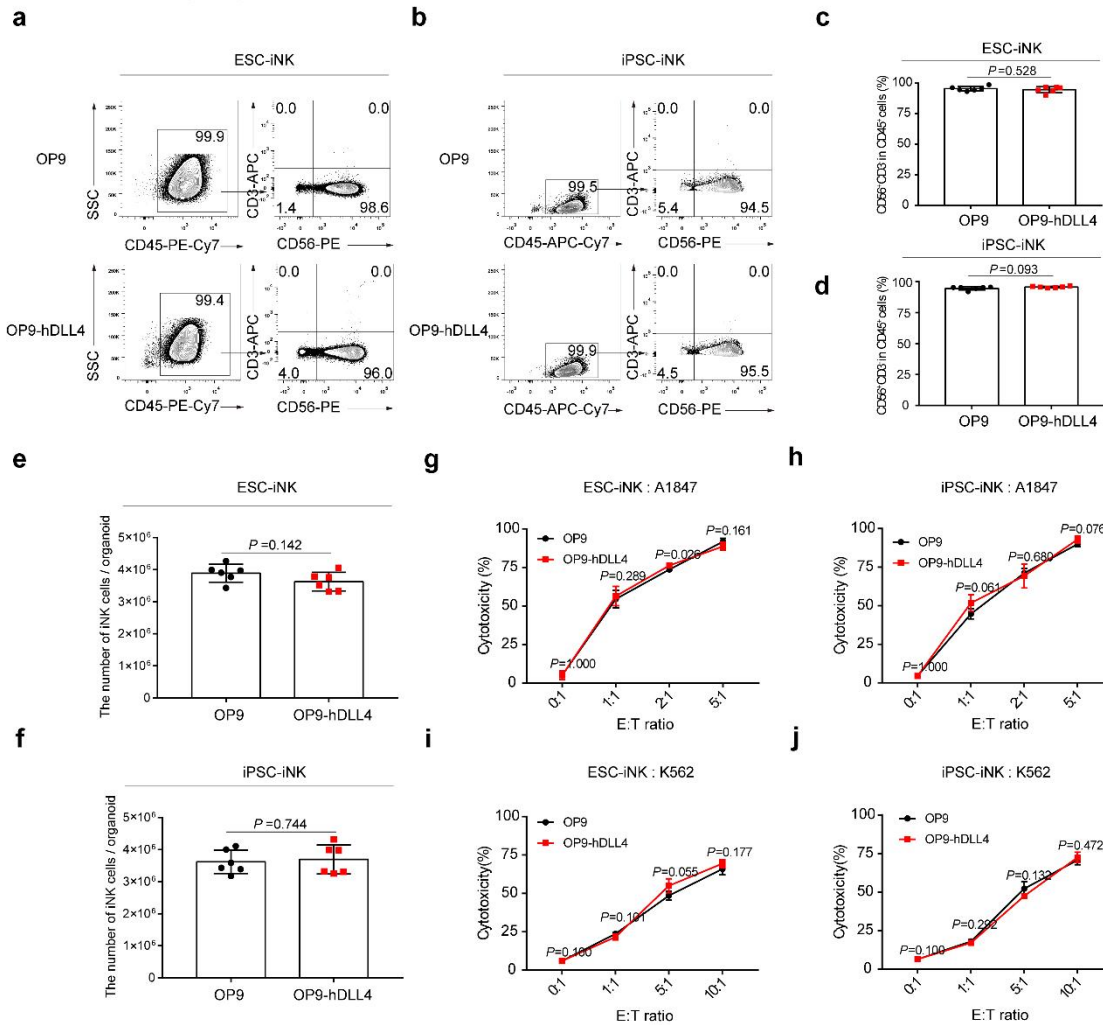

**Supplementary Fig. S3** Comparison of the induction efficiency, maturation, and cytotoxicities of iNK cells from ESCs and iPSCs using OP9 and OP9-hDLL4 feeder cells.

**a-b** Immuno-phenotypes (CD45<sup>+</sup>CD3<sup>+</sup>CD56<sup>+</sup>) of iNK cells from ESC (**a**) and iPSCs (**b**) on Day 27. **c-d** Statistics of the maturation of iNK cells from ESC (**c**) and iPSCs (**d**) on Day 27 ( $n = 6$  each group). **e-f** Statistics of the number of CD45<sup>+</sup>CD3<sup>+</sup>CD56<sup>+</sup> iNK cells on Day 27 ( $n = 6$  each group). **g-h** Cytotoxicity analysis of ESC-iNK cells (**g**) and iPSC-iNK cells (**h**) against A1847 cell line ( $n = 4$  each group). **i-j** Cytotoxicity analysis of ESC-iNK cells (**i**) and iPSC-iNK cells (**j**) against k562 cell line ( $n = 4$  each group). Statistics: two-tailed independent  $t$ -test (**c-j**) and Mann-Whitney U test (**g**).

## Supplementary Fig.S4

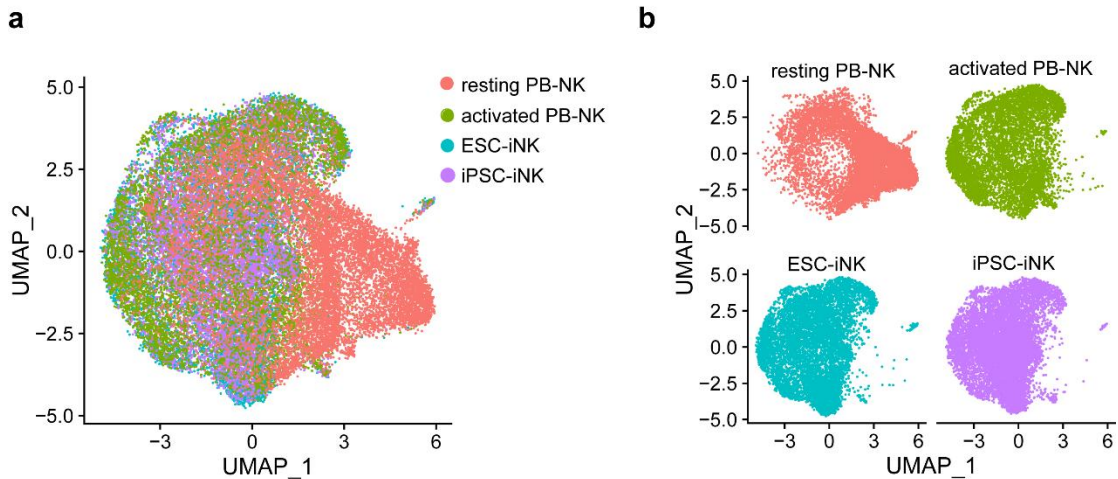

**Supplementary Fig. S4** Integration of scRNA-seq data generated from ESC-iNK, iPSC-iNK, resting PB-NK, and activated PB-NK cells. **a** Projection of ESC-iNK, iPSC-iNK, resting PB-NK, and activated PB-NK cells. **b** UMAP visualization of ESC-iNK, iPSC-iNK, resting PB-NK, and activated PB-NK cells respectively.

## Supplementary Fig.S5

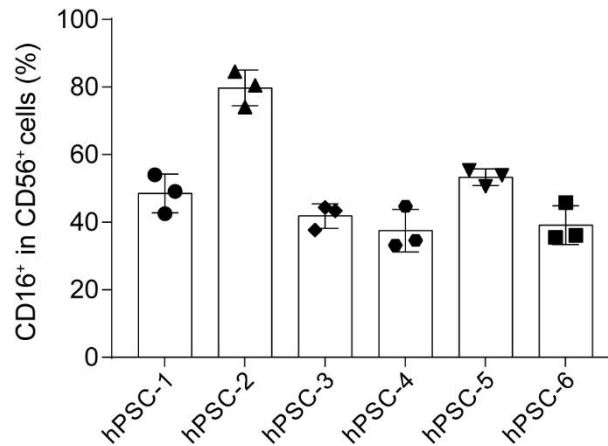

**Supplementary Fig. S5** CD16 molecule expression pattern of iNK cells.

CD16 expression levels of iNK cells and NK cells from human embryonic cell line hPSC-1, hPSC-2, hPSC-3, hPSC-4, hPSC-5, and human iPSC line hPSC-6. CD16<sup>+</sup> cells were gated on CD45<sup>+</sup>CD3<sup>-</sup>CD56<sup>+</sup> iNK cells. Data were collected from three independent experiments. All samples were collected on Day 27.

88 **Supplementary Table S1**

| Primer sequences for real-time quantitative PCR of selected genes |                         |
|-------------------------------------------------------------------|-------------------------|
| Primer name                                                       | Primer sequence (5'→3') |
| <i>β-ACTIN</i> -F                                                 | CATGTACGTTGCTATCCAGGC   |
| <i>β-ACTIN</i> -R                                                 | CTCCTTAATGTCACGCACGAT   |
| <i>TBXT</i> -F                                                    | TATGAGCCTCGAATCCACATAGT |
| <i>TBXT</i> -R                                                    | CCTCGTTCTGATAAGCAGTCAC  |
| <i>APLNR</i> -F                                                   | CTCTGGACCGTGTTTCGGAG    |
| <i>APLNR</i> -R                                                   | GGTACGTGTAGGTAGCCCACA   |
| <i>HAND1</i> -F                                                   | GAGAGCATTAACAGCGCATTTCG |
| <i>HAND1</i> -R                                                   | CGCAGAGTCTTGATCTTGGAGAG |
| <i>MSGNI</i> -F                                                   | AACCTGCGCGAGACTTTCC     |
| <i>MSGNI</i> -R                                                   | GTCTGTGAGTTCCCCGATGTA   |

89
